# Supplementary material for: Revising the pathways of the Li reaction with organic carbonates
Source: Royal Society of Chemistry journal article supplement (doi:10.1039/d0cp02228d), 2020-01-01
Supplement: d0cp02228d1.pdf [file d0cp02228d1.pdf]

## Supporting information

### Revising the pathways of Li reaction with organic carbonates

Alexey Rulev,<sup>a,b</sup> Alexander Frolov,<sup>a,b</sup> Sergey Doronin,<sup>a,b</sup> Iliya Bezuglov,<sup>a</sup> Daniil M. Itkis,<sup>a,b</sup> Lada V. Yashina<sup>a,b</sup>

<sup>a</sup> N.N. Semenov Federal Research Center for Chemical Physics RAS, Kosygina Street 4, 119991 Moscow, Russia

<sup>b</sup> Faculty of Chemistry, Lomonosov Moscow State University, Leninskie gory 1 bld. 3, 119991 Moscow, Russia.

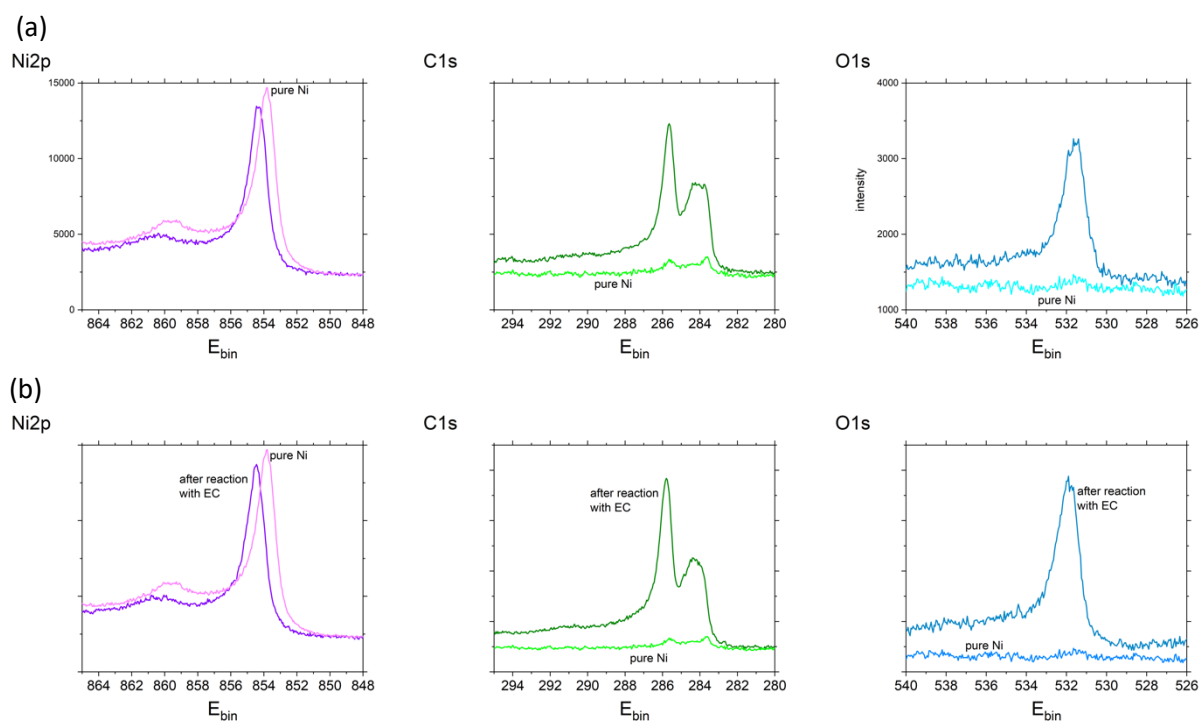

**Figure S1.** Spectra of clean Ni surface and surface of Ni after reaction with (a) PC (b) EC.

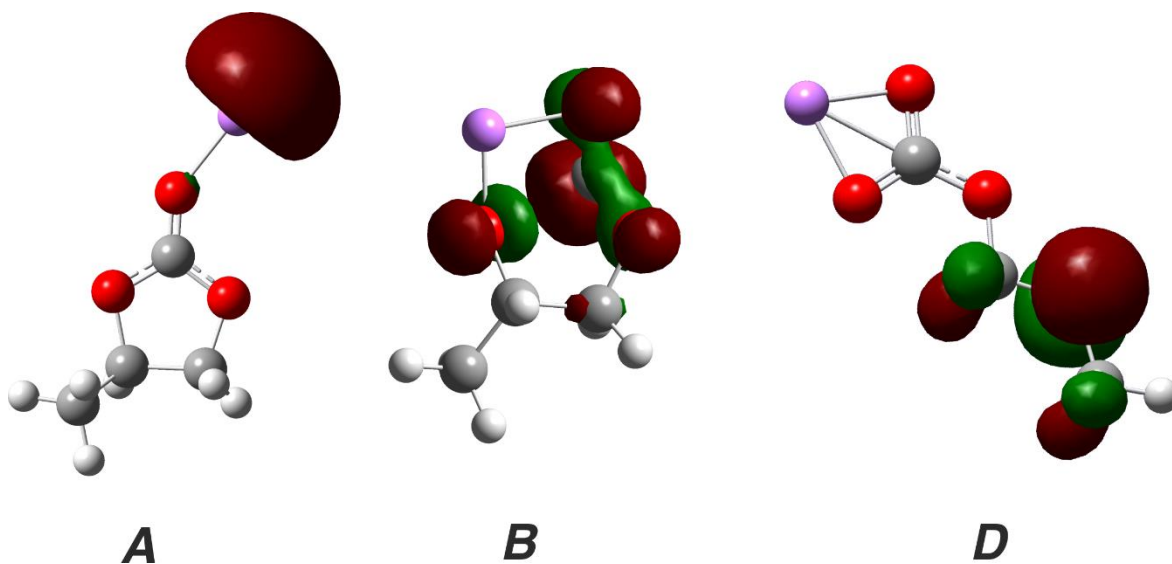

**Figure S2.** Isosurface plots of an unpaired electron charge density at a value=0.05 for A, B, D radicals.

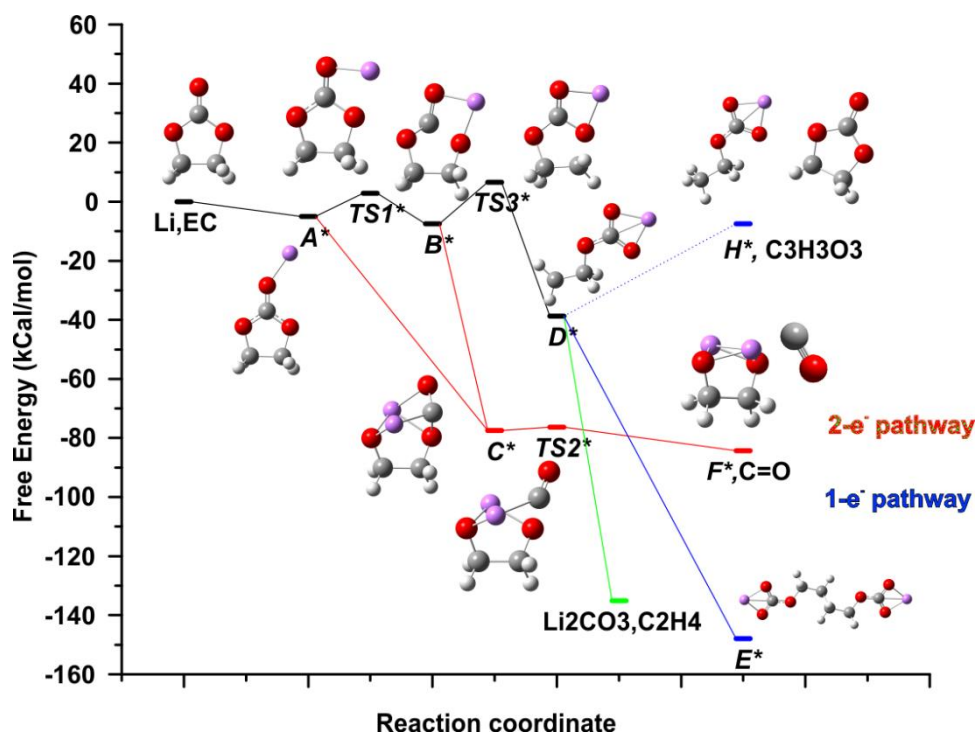

**Figure S3.** Energy diagram of the reaction between Li atoms and ethylene carbonate molecules.

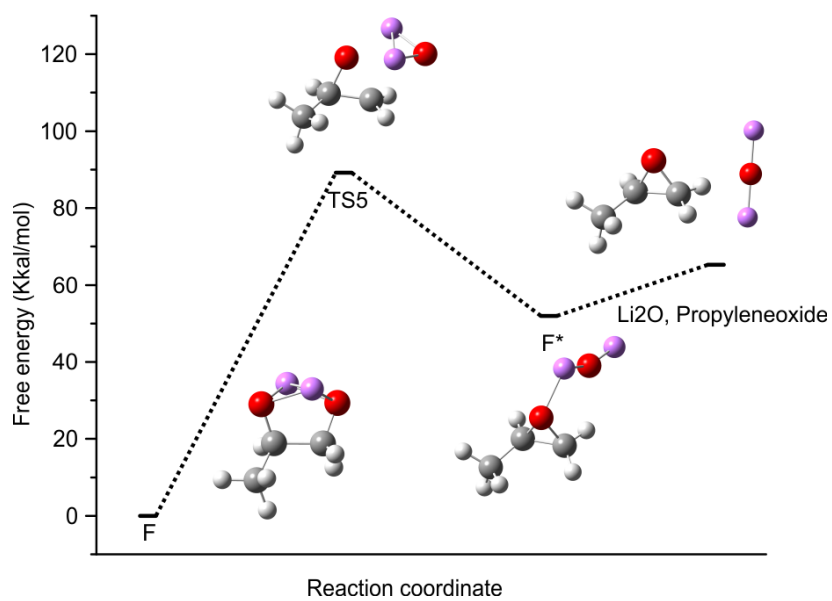

**Figure S4.** Energy diagram of the decomposition of DD into Li<sub>2</sub>O

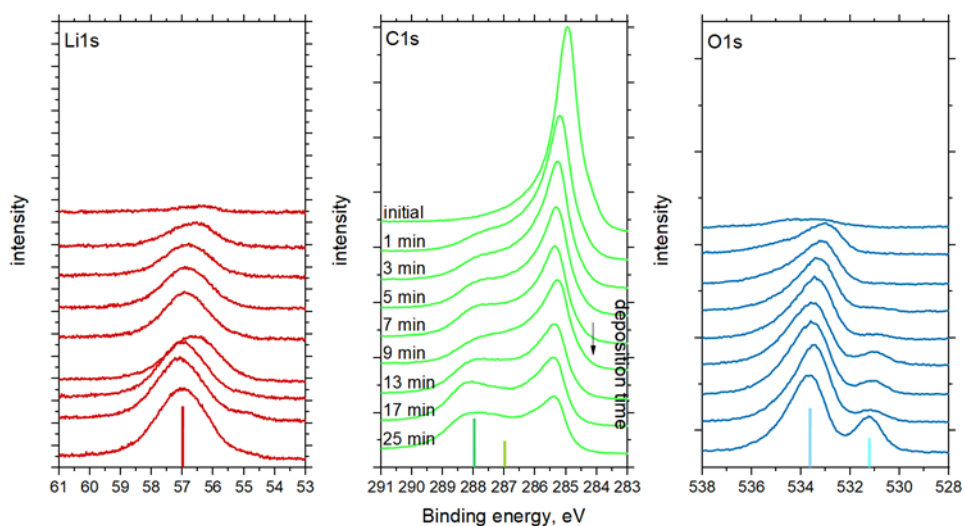

**Figure S5.** Spectra of lithium deposited on graphene in PC.

|          | Li    |       | O     |       | C     |       |       |       |
|----------|-------|-------|-------|-------|-------|-------|-------|-------|
|          | Li1   | Li2   | O1    | O2    | C1    | C2    | C3    | C4    |
| <b>0</b> | 55.5  | 54.6  | 532.2 | 529.8 |       |       | 284.5 | 283.0 |
|          | 20206 | 11472 | 782   | 3413  |       |       | 3006  | 2907  |
| <b>1</b> | 56.1  | 55.0  | 532.6 | 530.0 | 287.7 | 286.8 | 284.3 | 282.9 |
|          | 22998 | 6444  | 5088  | 5186  | 8365  | 3715  | 3339  | 3592  |
| <b>2</b> | 56.2  | 55.2  | 532.4 | 529.9 | 287.6 | 286.6 | 284.5 | 283.1 |
|          | 23265 | 8659  | 8803  | 7859  | 17187 | 6778  | 1410  | 4506  |
| <b>3</b> | 55.7  | 55.1  | 532.2 | 529.7 | 287.3 | 286.3 | 284.6 | 283.2 |
|          | 25484 | 5453  | 15490 | 6617  | 18940 | 6622  | 334   | 3275  |
| <b>4</b> | 55.7  | 55.0  | 532.1 | 529.6 | 287.2 | 286.3 | 284.5 | 283.2 |
|          | 26902 | 4423  | 15574 | 7393  | 26121 | 12043 | 379   | 3978  |
| <b>5</b> | 55.6  | 55.0  | 531.9 | 529.4 | 287.0 | 286.1 | 284.6 | 283.3 |
|          | 25405 | 6947  | 17352 | 7971  | 25076 | 11809 | 569   | 5057  |

**Table S1.** Binding energies and absolute intensities of different components of spectra in figure 2

| N | Li    |       | O     |       |       | C     |       |       |       |       |
|---|-------|-------|-------|-------|-------|-------|-------|-------|-------|-------|
|   | Li1   | Li2   | O3    | O1    | O2    | C1    | C2    | C3    | C4    | C5    |
| 0 |       |       |       | 530.9 |       |       |       | 285.3 | 283.9 | 283.3 |
|   |       |       |       | 4647  |       |       |       | 16677 | 15758 | 2679  |
| 1 | 56.0  |       | 532.8 | 531.6 |       | 286.7 | 285.6 | 284.8 | 283.8 | 283.3 |
|   |       | 12366 | 6979  | 8464  |       | 30150 | 7715  | 12879 | 6742  | 1957  |
| 2 | 55.7  |       | 532.6 | 531.8 | 529.4 | 287.0 | 285.9 | 284.7 | 284.0 | 283.3 |
|   |       | 20210 | 8170  | 7819  | 3530  | 32664 | 11948 | 6226  | 3171  | 7258  |
| 3 | 56.0  | 55.3  | 532.1 |       | 529.6 | 287.4 | 286.4 | 284.7 |       | 283.4 |
|   | 6117  | 21455 | 16896 |       | 6011  | 28726 | 15639 |       | 11848 | 4691  |
| 4 | 56.3  | 55.5  | 532.3 |       | 529.8 | 287.4 | 286.5 | 284.5 |       | 283.4 |
|   | 19745 | 12105 | 16641 |       | 6181  | 32207 | 16063 |       | 11518 | 3811  |

**Table S2.** Binding energies and absolute intensities of different components of spectra in figure 3

| N  | Li    |       | O     |       |       | C     |       |       |       |       |
|----|-------|-------|-------|-------|-------|-------|-------|-------|-------|-------|
|    | Li1   | Li2   | O3    | O1    | O2    | C1    | C2    | C3    | C4    | C5    |
| 0  |       |       |       | 531.0 |       |       |       | 285.2 | 283.9 | 283.4 |
|    |       |       |       | 5050  |       |       |       | 18538 | 8000  | 3566  |
| 2  | 56.1  |       | 532.2 | 531.3 |       | 286.4 | 285.6 | 285.0 | 283.9 | 283.4 |
|    |       | 6177  | 5036  | 4958  |       | 9576  | 5446  | 30436 | 6260  | 949   |
| 4  | 56.1  |       | 532.7 | 531.5 |       | 286.6 | 285.9 | 284.9 | 283.8 | 283.3 |
|    |       | 10167 | 5774  | 7743  |       | 17903 | 2687  | 24089 | 2473  | 2134  |
| 6  | 56.1  |       | 533.0 | 531.8 | 529.5 | 286.8 | 285.7 | 284.9 | 283.7 | 283.4 |
|    |       | 17026 | 6168  | 11601 | 352   | 26697 | 4381  | 15743 | 2206  | 2208  |
| 9  | 56.3  | 55.4  | 532.5 |       | 529.9 | 287.5 | 286.6 | 285.8 | 283.6 | 283.4 |
|    | 26435 | 10987 | 19753 |       | 7517  | 40049 | 3851  | 8508  | 1856  | 3067  |
| 10 | 56.4  | 55.4  | 532.6 |       | 530.0 | 287.6 | 286.4 | 285.8 |       | 283.5 |
|    | 31539 | 8164  | 21236 |       | 8758  | 41063 | 3210  |       | 10112 | 4315  |

**Table S3.** Binding energies and absolute intensities of different components of spectra in figure 4
